# Supplementary material for: Structural prerequisites for CRM1-dependent nuclear export signaling peptides: accessibility, adapting conformation, and the stability at the binding site
Source: PubMed Central journal article supplement (PMC6488578; doi:10.1038/s41598-019-43004-0), 2019-04-29
Supplement: 41598_2019_43004_MOESM1_ESM.pdf [file 41598_2019_43004_MOESM1_ESM.pdf]

*Supporting information*

**Structural prerequisites for CRM1-dependent nuclear export signaling peptides: accessibility, adapting conformation, and the stability at the binding site**

Yoonji Lee,<sup>1</sup> Jimin Pei,<sup>2</sup> Jordan M. Baumhardt,<sup>3</sup> Yuh Min Chook,<sup>3</sup> and Nick V. Grishin<sup>\*,1,2</sup>

<sup>1</sup>Department of Biophysics, University of Texas Southwestern Medical Center, Dallas, TX 75390, USA. <sup>2</sup>Howard Hughes Medical Institute, University of Texas Southwestern Medical Center, Dallas, TX 75390, USA. <sup>3</sup>Department of Pharmacology, University of Texas Southwestern Medical Center, Dallas, TX 75390, USA.

\*Correspondence to: [grishin@chop.swmed.edu](mailto:grishin@chop.swmed.edu) (NV Grishin)

## Table of Contents

|                                                                                                                   |     |
|-------------------------------------------------------------------------------------------------------------------|-----|
| Table S1. NES candidate motifs located in the highly ordered region -----                                         | S3  |
| Table S2. NES candidate motifs which have $\beta$ -strand components in the middle -----                          | S4  |
| Table S3. Number of positive and negative cases of the NES prediction results -----                               | S5  |
| Table S4. Performance comparison of $E_{\text{bind}}$ score to other sequence-based predictors -----              | S6  |
| Figure S1. Distribution of the classes -----                                                                      | S7  |
| Figure S2. Location decision with respect to the disordered or ordered domain and the conserved domain -<br>----- | S7  |
| Figure S3. Correction with the residue solvent accessibility (RSA) -----                                          | S8  |
| Figure S4. Predicted NES motifs of MEK1 (uniprot ID: Q05116) using Ebind, locNES, netNES, and<br>NESmapper -----  | S8  |
| Figure S5. Predicted NES motifs of p73 (uniprot ID: O15350) -----                                                 | S9  |
| Figure S6. Predicted NES motifs of ADAR1 (uniprot ID: P55265) -----                                               | S10 |
| Figure S7. Predicted NES motifs of PKI (uniprot ID: P61925) -----                                                 | S10 |
| Figure S8. Predicted NES motifs of MVM (uniprot ID: Q83414) -----                                                 | S11 |
| Figure S9. Predicted NES motifs of STRAD (uniprot ID: Q7RTN6) -----                                               | S11 |
| Figure S10. Predicted NES motifs of HDAC5 (uniprot ID: Q9UQL6) -----                                              | S12 |
| Figure S11. Predicted NES motifs of SNUPN (uniprot ID: O95149) -----                                              | S12 |
| Figure S12. Predicted NES motifs of HPV16E7 (uniprot ID: P03129) -----                                            | S13 |
| Figure S13. Predicted NES motifs of HIV-REV (uniprot ID: P69718) -----                                            | S13 |
| Figure S14. Predicted NES motifs of hRio2 (uniprot ID: Q9BVS4) -----                                              | S14 |
| Figure S15. Predicted NES motifs of CPEB4 (uniprot ID: Q17RY0) -----                                              | S14 |
| Figure S16. Predicted NES motifs of mDia2 (uniprot ID: Q9Z207) -----                                              | S15 |
| Figure S17. Predicted NES motifs of CDC7 (uniprot ID: O00311) -----                                               | S15 |
| Figure S18. Predicted NES motifs of FMRP (uniprot ID: Q06787) -----                                               | S16 |
| Figure S19. Predicted NES motifs of Smad4 (uniprot ID: Q13485) -----                                              | S16 |
| Figure S20. Predicted NES motifs of X11L2 (uniprot ID: O96018) -----                                              | S17 |

**Table S1. NES candidate motifs located in the highly ordered region.**

| name         | start# | sequence                           | secondary structure | <sup>†</sup> loc_DISO | <sup>†</sup> loc_CDD                         | reference DB               |
|--------------|--------|------------------------------------|---------------------|-----------------------|----------------------------------------------|----------------------------|
| ACT1         | 167    | AGFSLPHAILRIDLAG<br>+++++          | CCCCCCHHHHHCCCC     | ORD                   | MID NBD_sugar-kinase_HSP70_actin superfamily | validNES:P009              |
| BPV-E1       | 405    | QNIELITFINALKLWL<br>+++++          | CCCCHHHHHHHHHHH     | ORD                   | MID PHA02774                                 | NESdb:139<br>validNES:P187 |
| BPV-E1       | 405    | QNIELITFINALKLWL<br>+++++          | CCCCHHHHHHHHHHH     | ORD                   | MID PHA02774                                 | NESdb:139<br>validNES:P187 |
| E4-34kD      | 82     | DMVLTREELVILRK<br>+++++            | CCCCCHHHHHHHHC      | ORD                   |                                              | NESdb:17                   |
| FAK          | 514    | RKYSLDLASLILYA<br>+++++            | CCCCCCHHHHHHHH      | ORD                   | MID PTKc_FAK                                 | NESdb:83                   |
| Fbxo7        | 322    | QALNLPDVFGVLVPL<br>*++++*          | HHCCCCCCCCCCCCCH    | ORD                   | boundary PI31_Prot_N superfamily             | NESdb:230                  |
| Fbxo7        | 325    | NLPDVFGVLVLP<br>*+++*              | CCCCCCCCCCCC        | ORD                   | boundary PI31_Prot_N superfamily             | NESdb:230                  |
| Fbxo7        | 333    | VVLPLELKLRIFRLLD<br>+++++          | CCCCHHHHHHHHCCCC    | ORD                   | boundary PI31_Prot_N superfamily             | NESdb:230                  |
| HDAC1        | 149    | GFCYVNDIVLAILE<br>* *              | CCCHHHHHHHHHHH      | ORD                   | MID HDAC1                                    | NESdb:252                  |
| HDAC1        | 149    | GFCYVNDIVLAILELLK<br>* * *         | CCCHHHHHHHHHHHHH    | ORD                   | MID HDAC1                                    | NESdb:252                  |
| HDAC1        | 152    | YVNDIVLAILELLK<br>* * *            | HHHHHHHHHHHHHH      | ORD                   | MID HDAC1                                    | NESdb:252                  |
| HDAC1        | 152    | YVNDIVLAILELLK<br>* * *            | HHHHHHHHHHHHHH      | ORD                   | MID HDAC1                                    | NESdb:252                  |
| hMSH4        | 786    | AFTLFATHFLELCH<br>*                | CEEEEECCCCHHHH      | ORD                   | MID MutS                                     | NESdb:185                  |
| hTERT        | 966    | AGRNMRRLKFLGVLRLKC<br>.....*.*.*.* | HHHHHHHHHHHHHHCC    | ORD                   | boundary TERT                                | NESdb:53<br>validNES:P049  |
| Lgals3       | 238    | RMKNLREISQLGISG<br>+++++           | CCCCCCCCCEEEEEEC    | ORD                   | boundary Gal-bind_lectin                     | validNES:P086              |
| MALT1        | 365    | DVYELTNLLRQLDFKV<br>+++++          | HHHHHHHHHHHCCCEE    | ORD                   | MID Peptidase_C14                            | validNES:P198              |
| MoKA; Fbxo38 | 183    | LKIPIGAKIQTLHLVG<br>*++++          | CCCCCCCCCEEEEEEC    | ORD                   |                                              | NESdb:202<br>validNES:P197 |
| NOA1         | 220    | YMVNLDLDPDALPDL<br>+++++           | EEEECCCCCCCCCCCC    | ORD                   | MID RbgA superfamily                         | NESdb:265                  |
| NPM1         | 83     | VQPTVSLGGFEITP<br>*++              | CCCCECCCCCECC       | ORD                   | boundary Nucleoplasmin                       | NESdb:93<br>validNES:P082  |
| Nr1i3        | 240    | VHVGQYEFLELIHF<br>+++++            | HHCCCHHHHHHHHHH     | ORD                   | MID NR_LBD superfamily                       | validNES:P194              |
| NURR1        | 435    | QDLLESAFLELFLVLR<br>+++++          | HHHHHHHHHHHHHHH     | ORD                   | MID NR_LBD_Nurr1                             | NESdb:246                  |
| NURR1        | 435    | QDLLESAFLELFLVLR<br>+++++          | HHHHHHHHHHHHHHH     | ORD                   | MID NR_LBD_Nurr1                             | NESdb:246                  |
| NURR1        | 440    | ESAFLELFLVRLAY<br>+++++            | HHHHHHHHHHHHHHH     | ORD                   | MID NR_LBD_Nurr1                             | NESdb:246                  |
| UL47         | 481    | ERYALSAYLTLFVALAE<br>+++++         | HHHHHHHHHHHHHHH     | ORD                   | MID Herpes_UL47 superfamily                  | validNES:P094              |
| Rsp5         | 683    | ELELLIGGIAEIDIED<br>.....*.*.*     | HHHHHHCCCCCCHHH     | ORD                   | MID HUL4                                     | NESdb:229                  |
| Smurf1       | 601    | ELELIIGGLDKIDLND<br>+++++          | HHHHHHCCCCCCHHH     | ORD                   | MID HECTc                                    | NESdb:58                   |
| Tax          | 187    | PYKRIEELLYKISLTT<br>+++++          | CHHHHHHHHHHHHCC     | ORD                   | MID Tax                                      | NESdb:84<br>validNES:P081  |
| Tax          | 194    | LLYKISLTTGALIILPE<br>+++++         | HHHHHHCCCCCEEEEC    | ORD                   | boundary Tax                                 | NESdb:84<br>validNES:P081  |
| Tax          | 194    | LLYKISLTTGALIILP<br>+++++          | HHHHHHCCCCCEEEEC    | ORD                   | boundary Tax                                 | NESdb:84<br>validNES:P081  |

<sup>†</sup>location of the segment with respect to the ordered (ORD) region

<sup>†</sup>location of the segment with respect to the known domains in CDD

**Table S2. NES candidate motifs which have  $\beta$ -strand components in the middle.**

| name                          | start# | sequence                           | secondary structure | reference DB               | available structures                                            |
|-------------------------------|--------|------------------------------------|---------------------|----------------------------|-----------------------------------------------------------------|
| Cdc6                          | 309    | SHLVLIIGIANTLIDLTD<br>+++++        | CCCCCCCCCCCCCCC     | NESdb:260                  | 1fnn.1.A; 162-547; Identity: 20.22%<br>$\beta$ -strand in model |
| COMMD1                        | 138    | IHTPVAIIIELELGK<br>+++++           | CCCCCCCCCCCCCCC     | NESdb:117                  | no available structure                                          |
| COMMD1                        | 155    | ESEFLCLEFDEVKVNQ<br>+++++          | CCCCCCCCCHHHHHH     | NESdb:117                  | no available structure                                          |
| COMMD1                        | 157    | EFLCLEFDEVKVNQ<br>+++++            | CCEEECHHHHHH        | NESdb:117                  | no available structure                                          |
| Crk                           | 260    | VGELVKVTKINVSG<br>** *             | CCCCCCCCCCCCCCC     | NESdb:57                   | 2eyz; 1-304<br>$\beta$ -strand in NMR                           |
| Dengue Virus NS5334<br>(2825) |        | VVPMVTQMAMTD<br>**.*.....          | CCCCCCCCCCCCCCC     | NESdb:78                   | 5ccv.2.A; 2498-3375; Identity: 79.73%<br>small helix in model   |
| FAK                           | 91     | RSEEVHWHVDMGVSS<br>+++++           | CCCCCCCCCCHHH       | NESdb:83                   | 4ny0; 34-405<br>$\beta$ -strand in x-ray                        |
| Hsc70/Hsc54;<br>HSPA8         | 384    | KSENVQDLLLDVTP<br>*++++            | CCCCCCCCCCCCCCC     | NESdb:67<br>validNES:P084  | 5e84.1.A; 4-609; Identity: 66.11%<br>$\beta$ -strand in model   |
| $\beta$ -Arrestin-2           | 384    | DDDIVFEDFARLRLKG<br>+++++          | CCCCCCCCCCCCCCC     | NESdb:241                  | 3p2d.1.A; 6-394; Identity: 95.42%<br>$\beta$ -strand in model   |
| IPMK                          | 170    | LMEEIGFLVLGMRVYH<br>+++++          | CCCCCCCCCCCCCC      | NESdb:253<br>validNES:P212 | 5w2i; 65-262<br>$\beta$ -strand in x-ray                        |
| LANA2                         | 547    | EQFDMVPLVIKRLRS<br>*+++++          | CCCCCCCCCCCCCC      | NESdb:218<br>validNES:P134 | no available structure                                          |
| LANA2                         | 551    | MVPLVIKRLRS<br>*+++++              | CCCCCCCCCC          | NESdb:218<br>validNES:P134 | no available structure                                          |
| MoKA; Fbxo38                  | 190    | KIQTLLHVGNVNPE<br>*+++++           | CEEEEECCCCCCC       | NESdb:202<br>validNES:P197 | no available structure                                          |
| Nibrin                        | 649    | PRKLLLTEFRSLVSN<br>...**.....*.*.. | CCCCCCCCCCCCCC      | NESdb:111                  | no available structure                                          |
| Nibrin                        | 650    | RKLLLTEFRSLVSNH<br>...**.....*.*.. | CCEEEEECCCCCCC      | NESdb:111                  | no available structure                                          |
| NOA1                          | 213    | PGPALVLYMVNLLDLPD<br>+++++         | CCCCCCCCCCCCCCC     | NESdb:265                  | no available structure                                          |
| NOA1                          | 214    | GPALVLYMVNLLDLPD<br>+++++          | CCCCCCCCCCCCCCC     | NESdb:265                  | no available structure                                          |
| NPM1                          | 38     | NEHQLSLRTVSLGA<br>*+++++           | CCCCCCCCCCCCCCC     | NESdb:93<br>validNES:P082  | 5ehd; 14-124; homo-5-mer<br>$\beta$ -strand in x-ray            |
| NPM1                          | 91     | GFEITPPVVLRLKC<br>*+++++           | CCECCCCCCCCCC       | NESdb:93<br>validNES:P082  | 5ehd; 14-124; homo-5-mer<br>$\beta$ -strand in x-ray            |
| nsP2 (VEE)<br>(1050)          | 515    | VLNQLCVRFFGLDLS<br>+++++           | HHCCCCCCCCCCCC      | NESdb:92<br>validNES:P190  | 5eqz.1.A; 1003-1322; Identity: 98.51%<br>helix in model         |
| p21Cip1; CDKN1A60             |        | EGDFAWERVRLGLPK<br>+++++           | CCCCCCCCCCCCCCC     | NESdb:210<br>validNES:P143 | 1jsu.1.C; 14-80; Identity: 39.71%<br>$\beta$ -strand in model   |
| Protein 9b                    | 41     | KVYPIILRLGSQLSLM<br>*+++++         | CEEEEECCCCCCHHH     | NESdb:214<br>validNES:P099 | 2cme; 9-25<br>$\beta$ -strand in x-ray                          |
| Protein UL84                  | 222    | RMAIVRLSLNLFALRI<br>*+++++         | HHCCCCCCCCCC        | NESdb:209<br>validNES:P087 | no available structure                                          |
| Protein UL84                  | 224    | AIVRLSLNLFALRIIT<br>*+++++         | CEEEEECCCCCCCC      | NESdb:209<br>validNES:P087 | no available structure                                          |
| Protein UL84                  | 355    | SPPDLTSSLTLYQ<br>*+++++            | CCCCCCCCCC          | NESdb:209<br>validNES:P087 | no available structure                                          |
| Sirt1                         | 423    | DEVDLLIVIGSSLKVRP<br>* *****       | CCCCCCCCCCCCCCC     | NESdb:264                  | 5btr.1.A; 166-505; Identity: 97.48%<br>$\beta$ -strand in model |
| Smad1                         | 402    | TVYELTKMCTIRMSF<br>*+++++          | EEEECCCCCCCCCC      | NESdb:40<br>validNES:P032  | 5zok; 266-462; heteromer<br>$\beta$ -strand in x-ray            |
| Smad1                         | 403    | VYELTKMCTIRMSF<br>*+++++           | EECCCCCCCCCC        | NESdb:40<br>validNES:P032  | 5zok; 266-462; heteromer<br>$\beta$ -strand in x-ray            |
| Smad1                         | 405    | ELTKMCTIRMSFVK<br>*+++++           | ECCCCCCCCCC         | NESdb:40<br>validNES:P032  | 5zok; 266-462; heteromer<br>$\beta$ -strand in x-ray            |
| SMARCB1                       | 262    | VIIKLNIVGNISLVD<br>+++++           | EEEEEEEECCCCCCC     | validNES:P218              | 517b.1.A; 259-319; Identity: 39.34%<br>$\beta$ -strand in model |
| Stau2                         | 1      | XMLQINQMFSVQLSLGE<br>*+++++        | CCCCCCCCCCCCCC      | NESdb:122                  | no available structure                                          |
| Stau2                         | 1      | XMLQINQMFSVQLSLGE<br>*+++++        | CCCCCCCCCCCCCC      | validNES:P139              | no available structure                                          |
| TDP-43                        | 244    | CGEDLIKGISVHI<br>***               | HCCCCCCCCCC         | NESdb:193                  | 4bs2; 102-269<br>$\beta$ -strand in NMR                         |

|        |     |                             |                   |                            |                                  |
|--------|-----|-----------------------------|-------------------|----------------------------|----------------------------------|
| TDP-43 | 246 | EDLIKIGISVHISNAE<br>***     | CCEEECCCEEEEEEECC | NESdb:193                  | 4bs2; 102-269<br>β-strand in NMR |
| VP3    | 29  | HCREIRIGIAGITITL<br>+++++++ | EEEEEEEEEEEEEEEE  | NESdb:134<br>validNES:P118 | no available structure           |
| VP3    | 31  | REIRIGIAGITITL<br>+++++++   | EEEEEEEEEEEEEEEE  | NESdb:134<br>validNES:P118 | no available structure           |

**Table S3. Number of positive and negative cases of the NES prediction results**

| protein        | # total | # NES | # predicted |      |      |      |      | # predicted |      |      |      |      | # predicted |      |    |     |   |    |    |   |     |    |
|----------------|---------|-------|-------------|------|------|------|------|-------------|------|------|------|------|-------------|------|----|-----|---|----|----|---|-----|----|
|                |         |       | # FP        | # FN | # TN | # TP | # FP | # FN        | # TN | # TP | # FP | # FN | # TN        | # TP |    |     |   |    |    |   |     |    |
| O00311_Cdc7    | 35      | 2     | 2           | 2    | 2    | 31   | 0    | 5           | 4    | 1    | 29   | 1    | 1           | 0    | 1  | 33  | 1 | 3  | 3  | 2 | 30  | 0  |
| O15350_p73     | 24      | 1     | 2           | 1    | 0    | 22   | 1    | 4           | 3    | 0    | 20   | 1    | 1           | 0    | 0  | 23  | 1 | 3  | 2  | 0 | 21  | 1  |
| O95149_SNUPN   | 13      | 1     | 2           | 1    | 0    | 11   | 1    | 2           | 1    | 0    | 11   | 1    | 0           | 0    | 1  | 12  | 0 | 0  | 0  | 1 | 12  | 0  |
| O96018_X11L2   | 17      | 1     | 2           | 1    | 0    | 15   | 1    | 2           | 1    | 0    | 15   | 1    | 0           | 0    | 1  | 16  | 0 | 1  | 1  | 1 | 15  | 0  |
| P03129_HPVI6E7 | 7       | 1     | 1           | 0    | 0    | 6    | 1    | 3           | 2    | 0    | 4    | 1    | 1           | 0    | 0  | 6   | 1 | 0  | 0  | 1 | 6   | 0  |
| P55265_ADAR1   | 22      | 1     | 3           | 2    | 0    | 19   | 1    | 4           | 3    | 0    | 18   | 1    | 0           | 0    | 1  | 21  | 0 | 3  | 2  | 0 | 19  | 1  |
| P61925_PKI     | 3       | 1     | 1           | 0    | 0    | 2    | 1    | 1           | 0    | 0    | 2    | 1    | 1           | 0    | 0  | 2   | 1 | 1  | 0  | 0 | 2   | 1  |
| P69718_HIV-REV | 6       | 1     | 1           | 0    | 0    | 5    | 1    | 2           | 1    | 0    | 4    | 1    | 1           | 1    | 1  | 4   | 0 | 2  | 2  | 1 | 3   | 0  |
| Q05116_STRAD   | 29      | 2     | 3           | 1    | 0    | 26   | 2    | 5           | 3    | 0    | 24   | 2    | 1           | 0    | 1  | 27  | 1 | 2  | 0  | 0 | 27  | 2  |
| Q06787_hRio2   | 14      | 1     | 1           | 0    | 0    | 13   | 1    | 2           | 2    | 1    | 11   | 0    | 0           | 0    | 1  | 13  | 0 | 0  | 0  | 1 | 13  | 0  |
| Q13485_HDAC5   | 42      | 1     | 4           | 3    | 0    | 38   | 1    | 4           | 3    | 0    | 38   | 1    | 1           | 1    | 1  | 40  | 0 | 4  | 3  | 0 | 38  | 1  |
| Q17RY0_mDia2   | 73      | 1     | 6           | 5    | 0    | 67   | 1    | 11          | 10   | 0    | 62   | 1    | 0           | 0    | 1  | 72  | 0 | 12 | 12 | 1 | 60  | 0  |
| Q7RTN6_CPEB4   | 12      | 1     | 2           | 1    | 0    | 10   | 1    | 2           | 1    | 0    | 10   | 1    | 1           | 1    | 1  | 10  | 0 | 0  | 0  | 1 | 11  | 0  |
| Q83414_MEK1    | 18      | 1     | 2           | 1    | 0    | 16   | 1    | 2           | 1    | 0    | 16   | 1    | 1           | 0    | 0  | 17  | 1 | 4  | 3  | 0 | 14  | 1  |
| Q9BVS4_FMRP    | 24      | 1     | 3           | 2    | 0    | 21   | 1    | 3           | 2    | 0    | 21   | 1    | 1           | 0    | 0  | 23  | 1 | 7  | 6  | 0 | 17  | 1  |
| Q9UQL6_Smad4   | 15      | 1     | 4           | 3    | 0    | 11   | 1    | 3           | 2    | 0    | 12   | 1    | 1           | 0    | 0  | 14  | 1 | 1  | 0  | 0 | 14  | 1  |
| Q9Z207_MVM     | 6       | 1     | 1           | 0    | 0    | 5    | 1    | 2           | 1    | 0    | 4    | 1    | 2           | 1    | 0  | 4   | 1 | 1  | 0  | 0 | 5   | 1  |
|                | 360     | 19    | 40          | 23   | 2    | 318  | 17   | 57          | 40   | 2    | 301  | 17   | 13          | 4    | 10 | 337 | 9 | 44 | 34 | 9 | 307 | 10 |

**Table S4. Performance comparison of  $E_{bind}$  score to other sequence-based predictors.**

|                                  | <i>E<sub>bind</sub></i> | <i>LocNES</i> | <i>NetNES</i> | <i>NESmapper</i> |
|----------------------------------|-------------------------|---------------|---------------|------------------|
| <b>TPR (recall, sensitivity)</b> | <b>0.895</b>            | <b>0.895</b>  | <b>0.474</b>  | <b>0.526</b>     |
| FNR (miss rate)                  | 0.105                   | 0.105         | 0.526         | 0.474            |
| <b>TNR (specificity)</b>         | <b>0.933</b>            | <b>0.883</b>  | <b>0.988</b>  | <b>0.9</b>       |
| FPR (fall-out)                   | 0.067                   | 0.117         | 0.012         | 0.1              |
| LR+                              | 13.27                   | 7.628         | 40.38         | 5.279            |
| LR-                              | 0.113                   | 0.119         | 0.533         | 0.526            |
| <b>DOR</b>                       | <b>117.5</b>            | <b>63.96</b>  | <b>75.83</b>  | <b>10.03</b>     |
| ACC (accuracy)                   | 0.931                   | 0.883         | 0.961         | 0.881            |
| PPV (precision)                  | 0.425                   | 0.298         | 0.692         | 0.227            |
| <b>F<sub>1</sub> score</b>       | <b>0.576</b>            | <b>0.447</b>  | <b>0.563</b>  | <b>0.317</b>     |

TPR (true positive rate; recall; sensitivity) =  $TP/(TP+FN)$

FNR (false negative rate; miss rate) =  $FN/(TP+FN)$

TNR (true negative rate; specificity) =  $TN/(TN+FP)$

FPR (false positive rate; fall-out) =  $FP/(TN+FP)$

LR+ (positive likelihood ratio) =  $TPR/FPR$

LR- (negative likelihood ratio) =  $FNR/TNR$

DOR (diagnostic odds ratio) =  $LR+/LR-$

ACC (accuracy) =  $(TP+TN)/(TP+TN+FP+FN)$

PPV (positive predictive value; precision) =  $TP/(TP+FP)$

F<sub>1</sub> score =  $2 * \text{precision} * \text{recall} / (\text{precision} + \text{recall})$

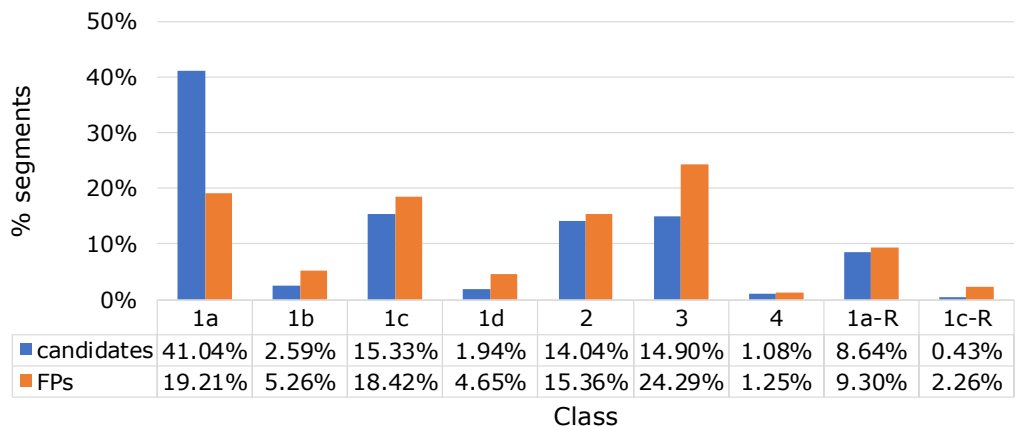

Figure S1. Distribution of the classes.

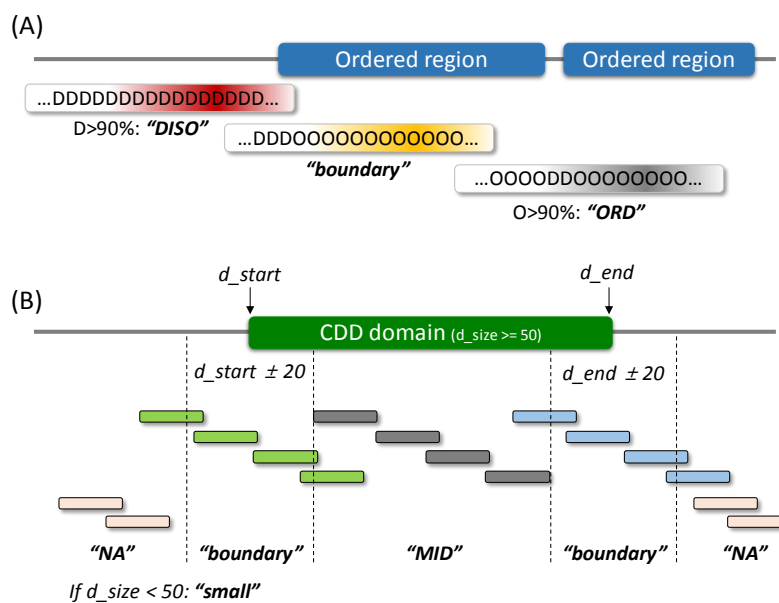

Figure S2. Location decision with respect to (A) the disordered or ordered domain and (B) the conserved domain.

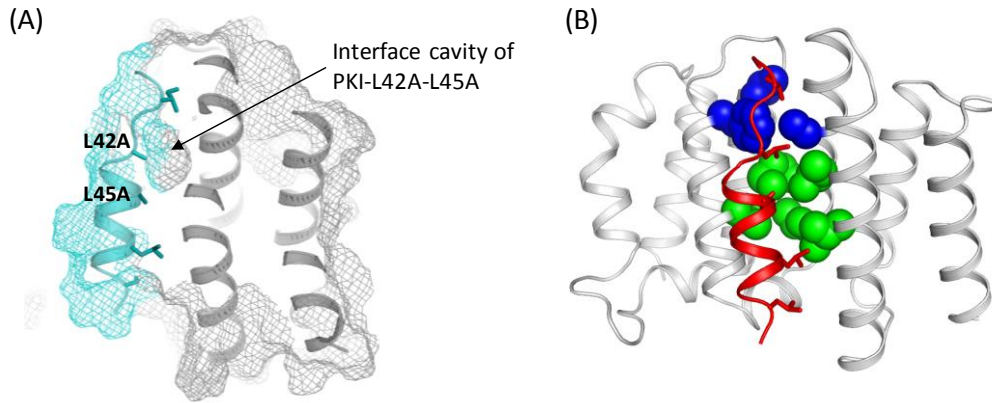

**Figure S3. Correction with the residue solvent accessibility (RSA).** (A) The internal cavity in the model of CRM1-PKI double mutant. (B) Residues of CRM1 utilized in the RSA calculation. The RSA values for V591, F583, A552 (blue), I555, M556, I532, V576, V559 (green) are extracted and summed. For the short peptides (class 3 such as CDC7 or mDia2), only the residues in green were utilized for RSA calculation.

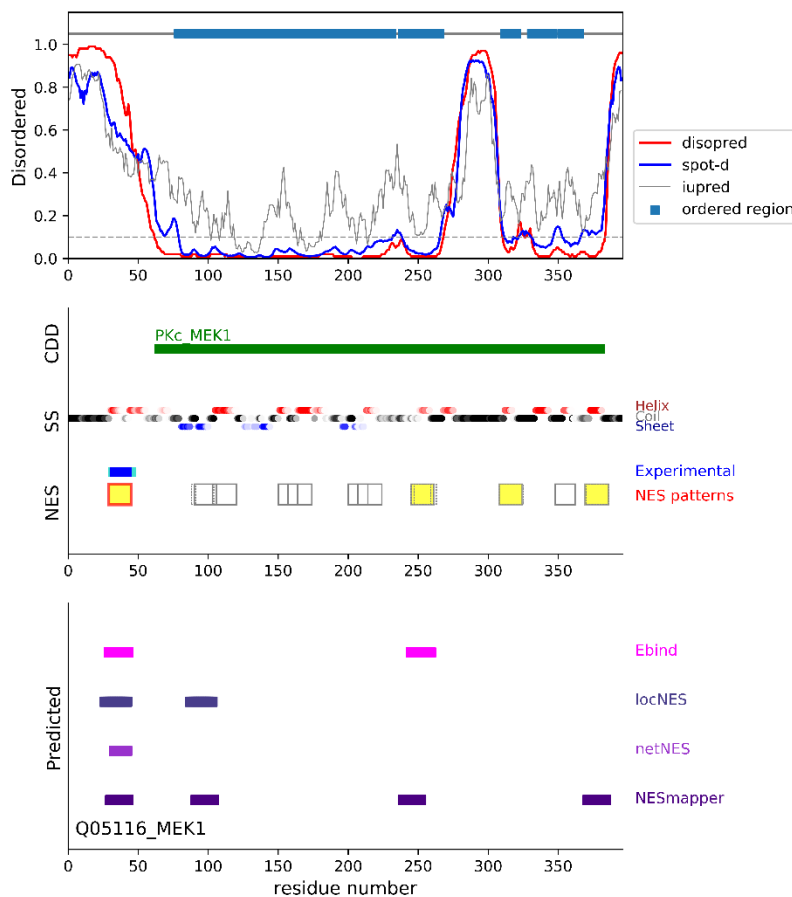

**Figure S4. Predicted NES motifs of MEK1 (uniprot ID: Q05116) using Ebind, locNES, netNES, and NESmapper.** Disordered propensity, known domain information, predicted secondary structure, and the location of the consensus patterns are plotted together. The defined ordered region (by the cutoff value of 0.1; gray dashed line) is represented by the sky-blue box at the top. The regions of the conserved domains annotated in the conserved domain database (CDD) are marked in the middle. The predicted secondary structures (SS) were colored by red, black, and blue for  $\alpha$ -



helix, coil, and  $\beta$ -strand, respectively. The gradient of the color corresponds to the confidence level of the prediction. For the NES regions, experimentally validated regions are displayed in blue (with mutation data annotated in NESdb) and cyan (annotated as a functional sequence in NESdb or as a site in validNES). All the consensus pattern matching segments (NES) are marked with black boxes. Segments not in the ordered regions and without  $\beta$ -strand predictions in the middle are highlighted in yellow. The red boxes are the pattern-matching segments overlapping with experimental evidence. The predicted NES motifs using Ebind, locNES, netNES, and NESmapper programs were represented by magenta, slate, violet, and dark purple, respectively, at the bottom.

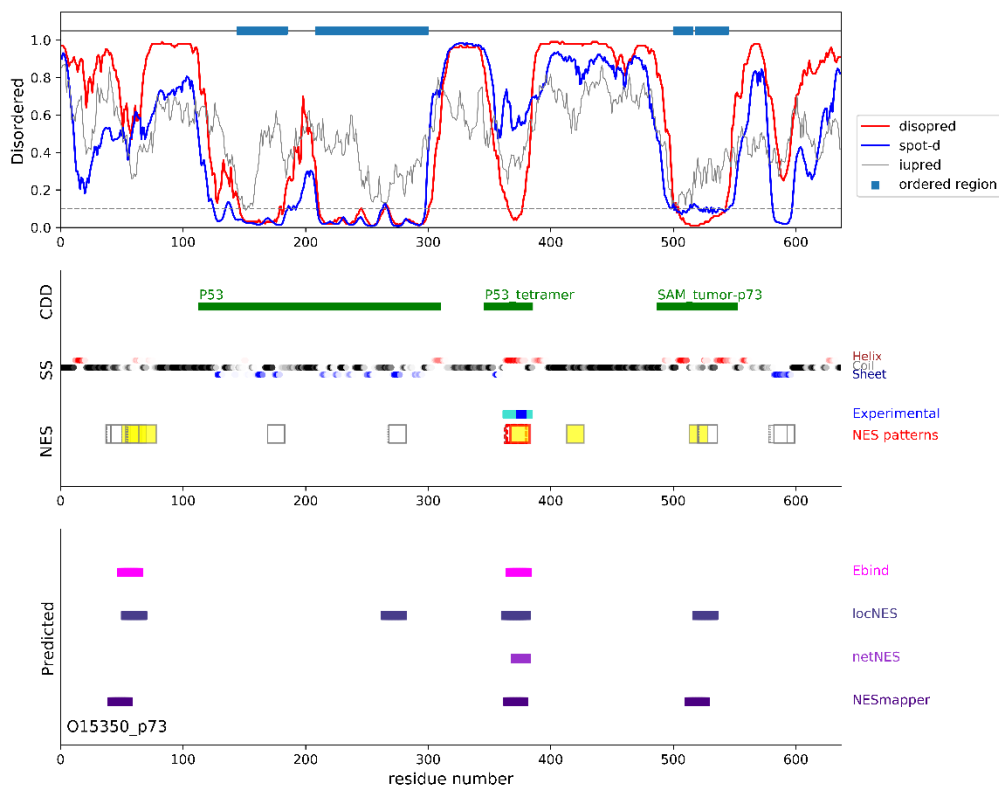

**Figure S5. Predicted NES motifs of p73 (uniprot ID: O15350) using Ebind, locNES, netNES, and NESmapper.**

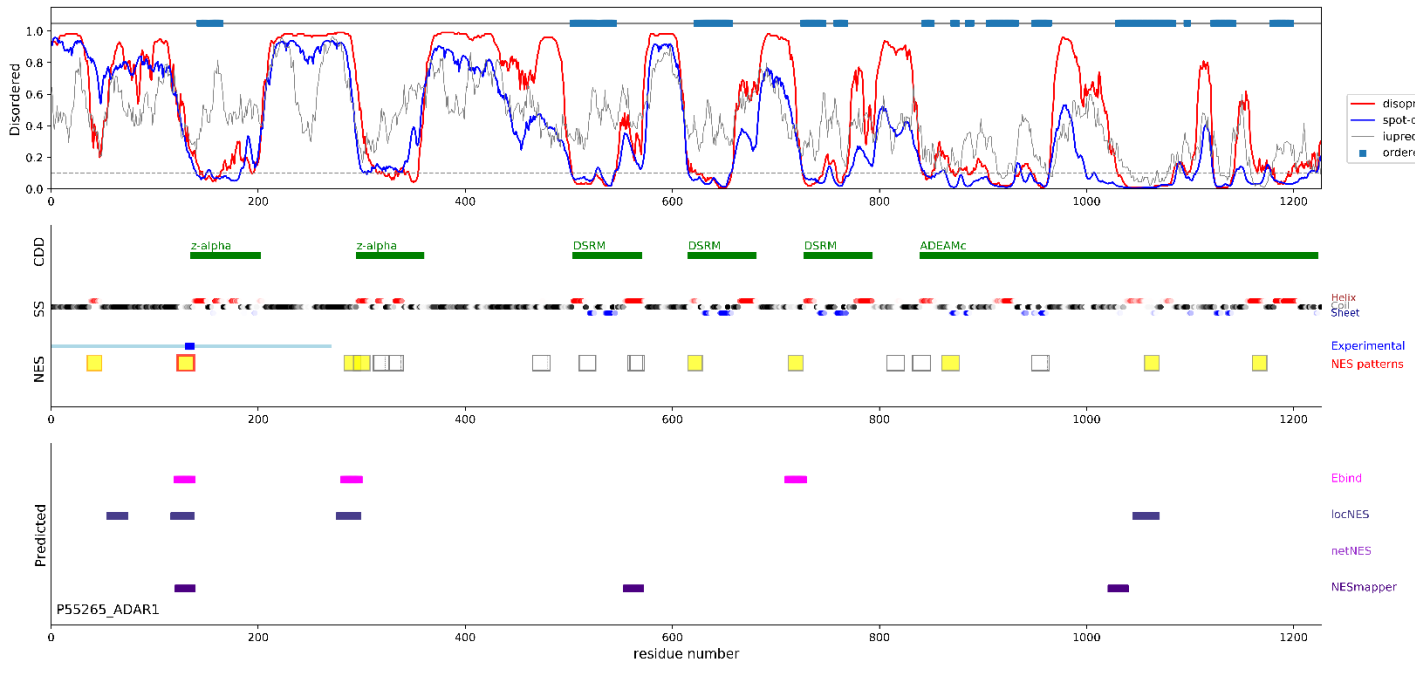

Figure S6. Predicted NES motifs of ADAR1 (uniprot ID: P55265) using Ebind, locNES, netNES, and NESmapper.

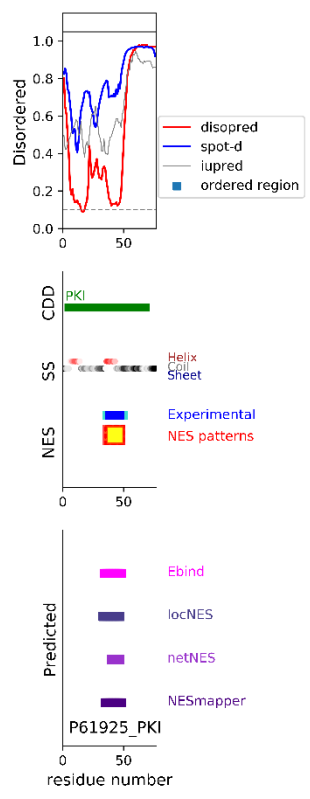

Figure S7. Predicted NES motifs of PKI (uniprot ID: P61925) using Ebind, locNES, netNES, and NESmapper.

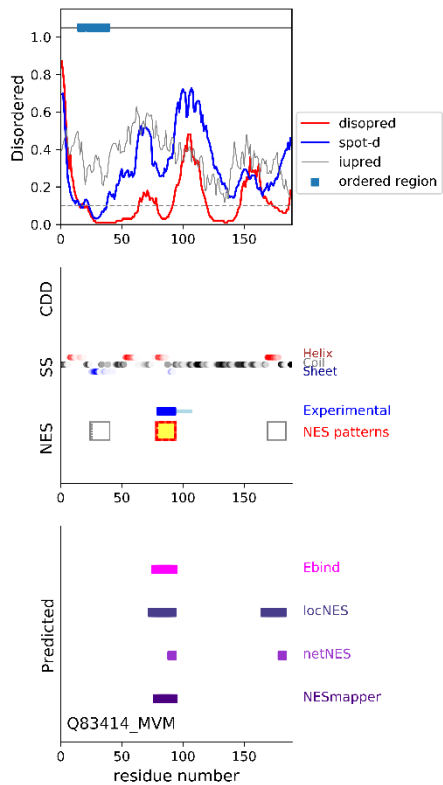

Figure S8. Predicted NES motifs of MVM (uniprot ID: Q83414) using Ebind, locNES, netNES, and NESmapper.

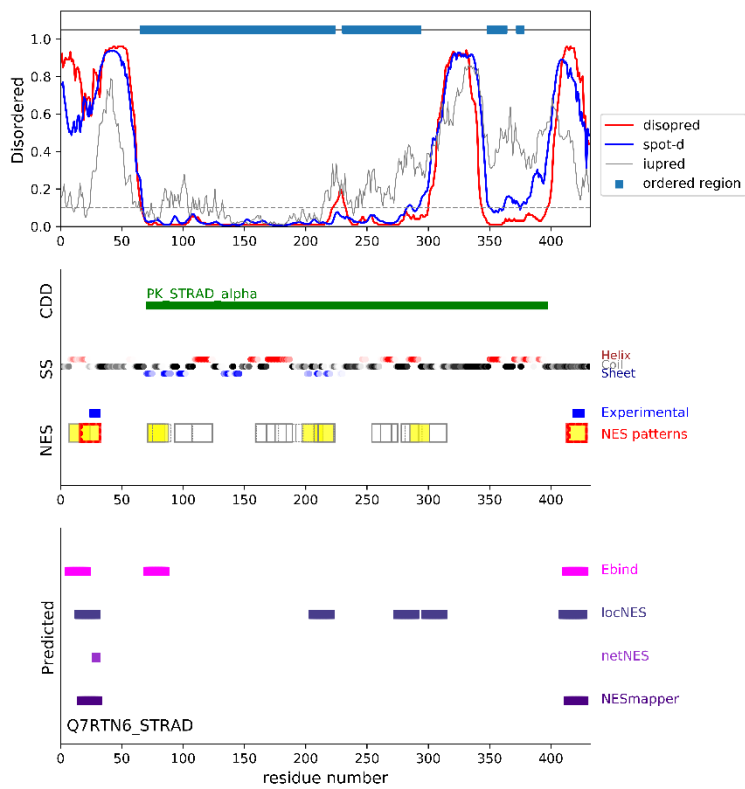

Figure S9. Predicted NES motifs of STRAD (uniprot ID: Q7RTN6) using Ebind, locNES, netNES, and NESmapper.

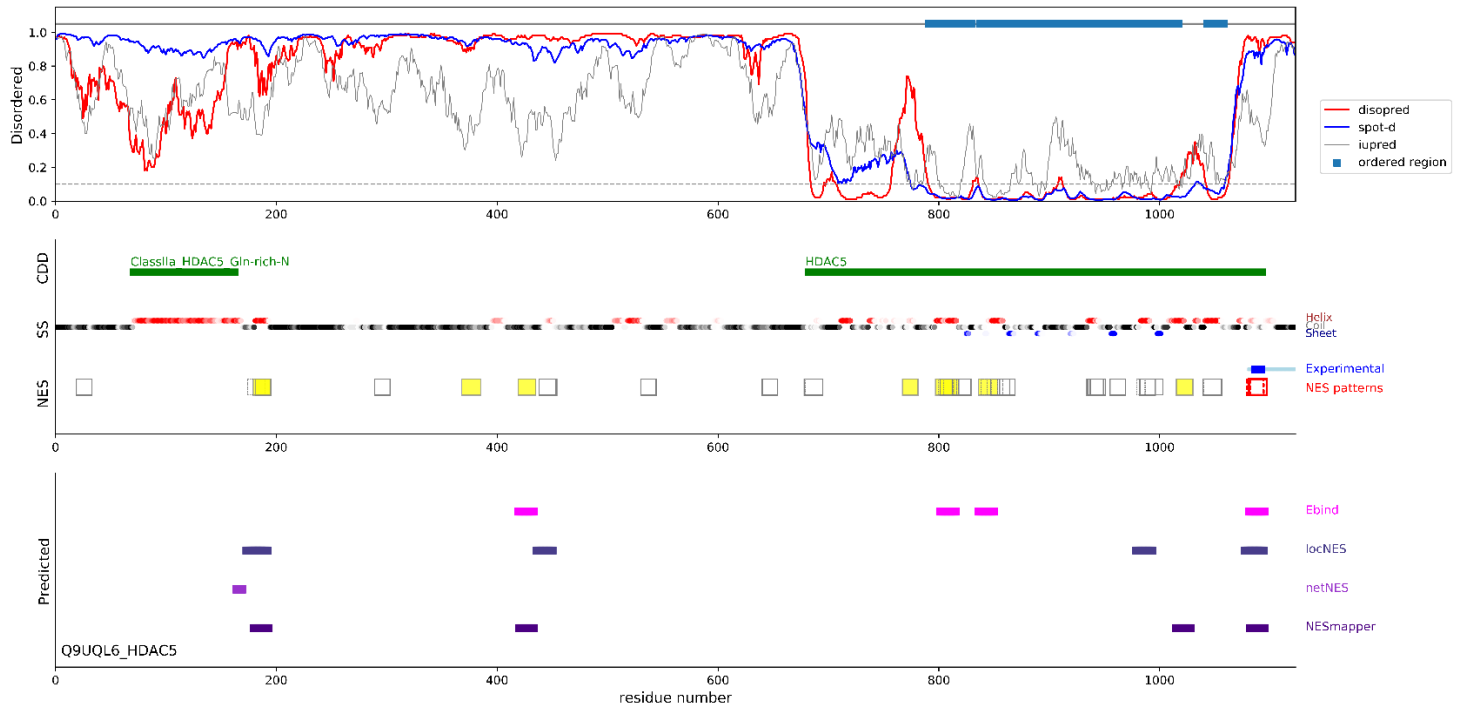

Figure S10. Predicted NES motifs of HDAC5 (uniprot ID: Q9UQL6) using E<sub>bind</sub>, locNES, netNES, and NESmapper.

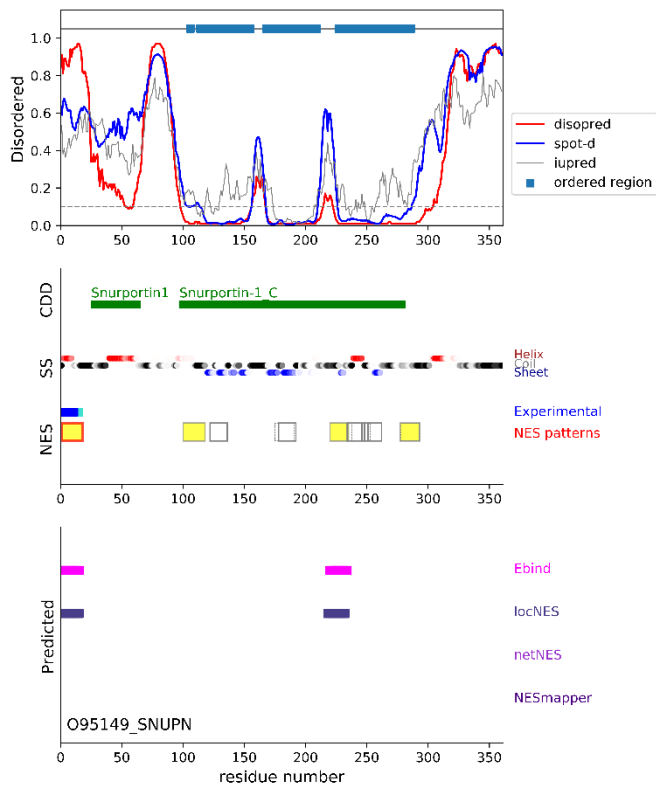

Figure S11. Predicted NES motifs of SNUPN (uniprot ID: O95149) using E<sub>bind</sub>, locNES, netNES, and NESmapper.

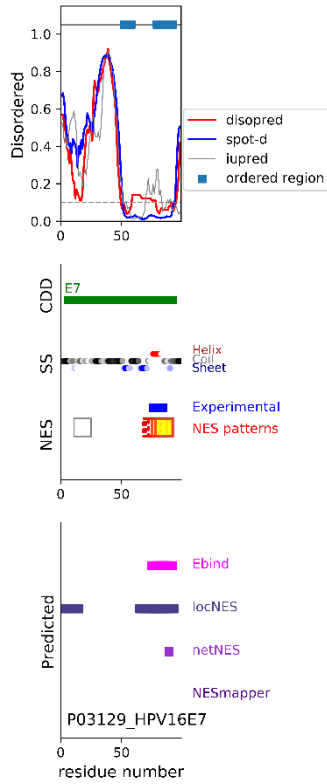

Figure S12. Predicted NES motifs of HPV16E7 (uniprot ID: P03129) using Ebind, locNES, netNES, and NESmapper.

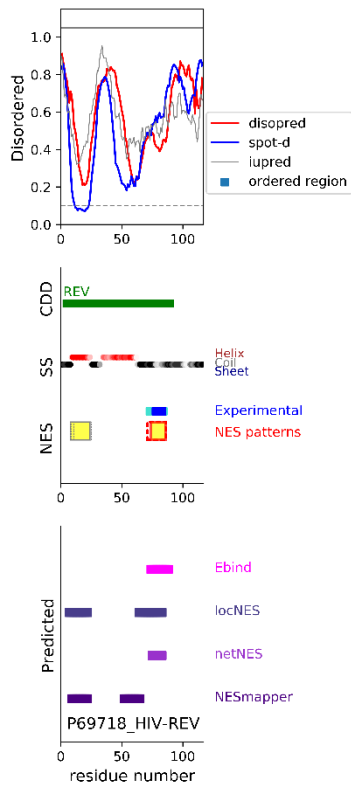

Figure S13. Predicted NES motifs of HIV-REV (uniprot ID: P69718) using Ebind, locNES, netNES, and NESmapper.

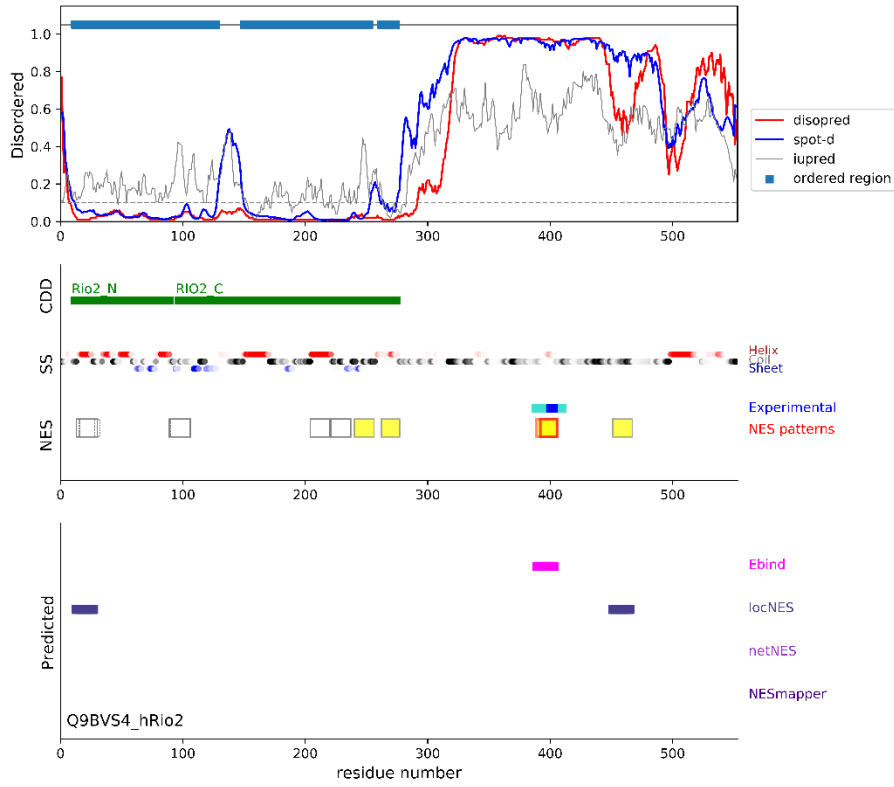

Figure S14. Predicted NES motifs of hRio2 (uniprot ID: Q9BVS4) using Ebind, locNES, netNES, and NESmapper.

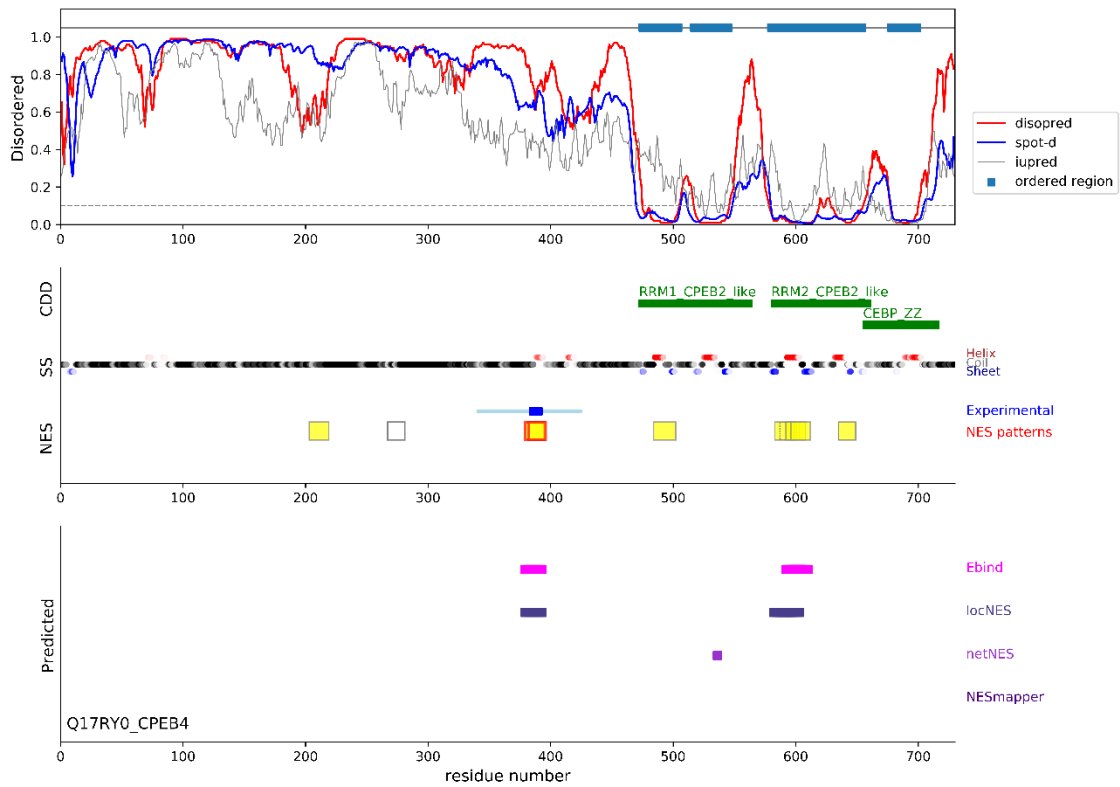

Figure S15. Predicted NES motifs of CPEB4 (uniprot ID: Q17RY0) using Ebind, locNES, netNES, and NESmapper.

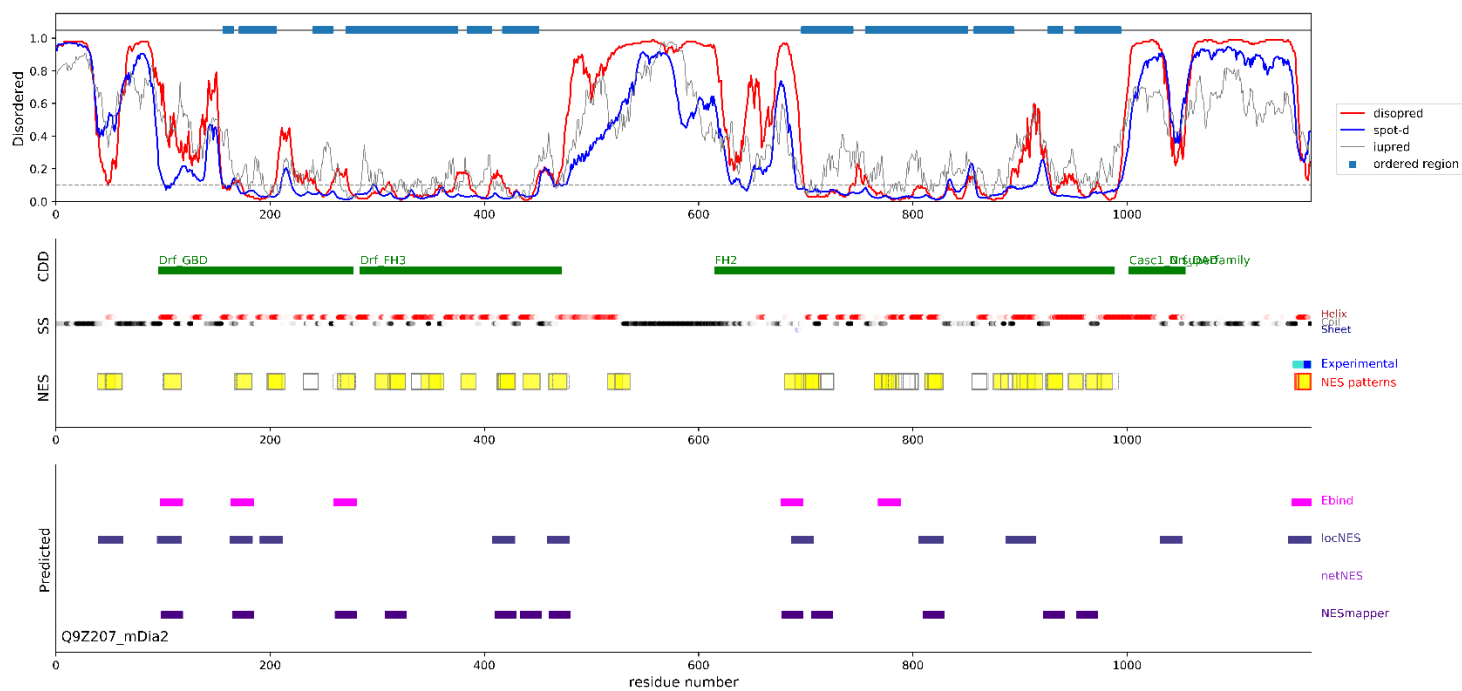

Figure S16. Predicted NES motifs of mDia2 (uniprot ID: Q9Z207) using Ebind, locNES, netNES, and NESmapper.

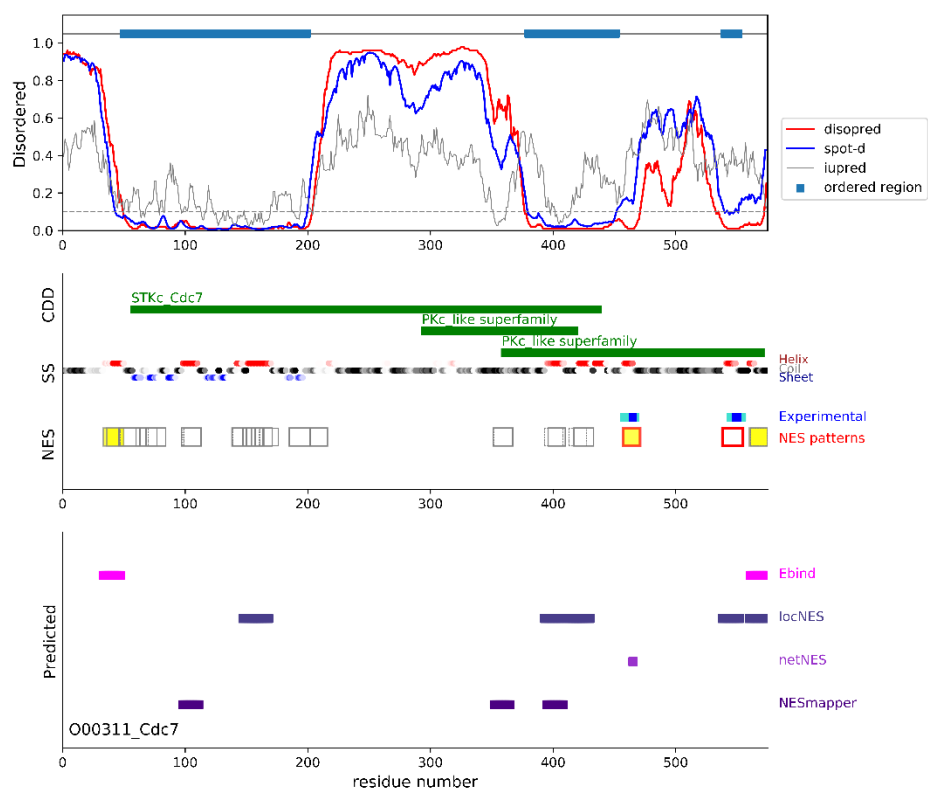

Figure S17. Predicted NES motifs of CDC7 (uniprot ID: O00311) using Ebind, locNES, netNES, and NESmapper.

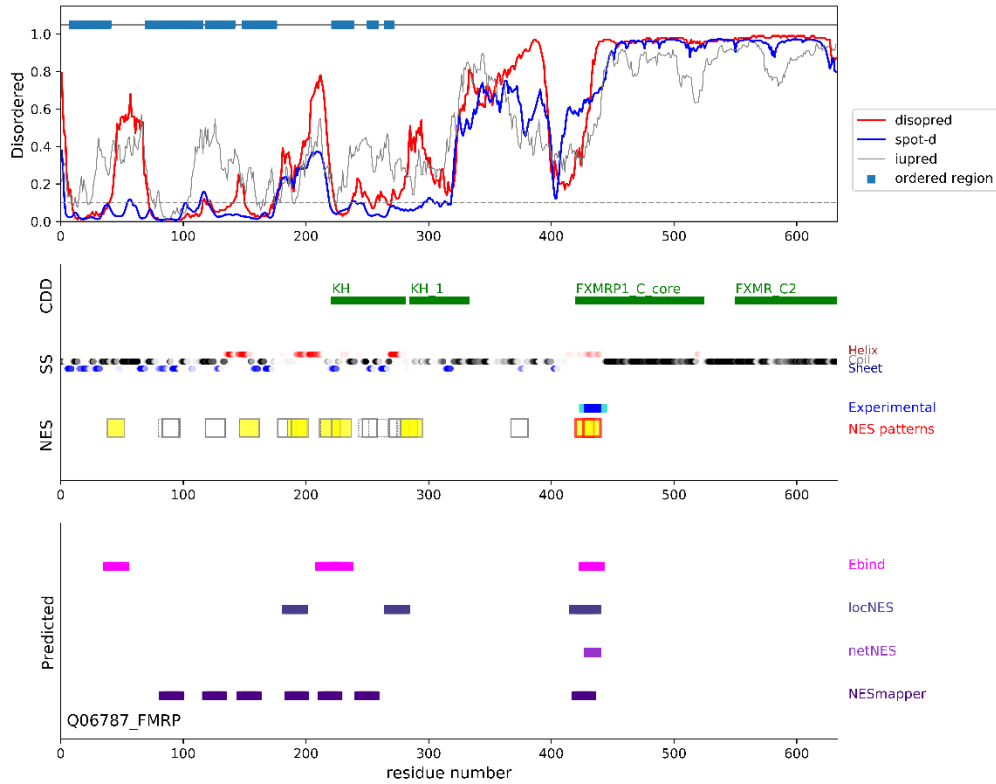

Figure S18. Predicted NES motifs of FMRP (uniprot ID: Q06787) using Ebind, locNES, netNES, and NESmapper.

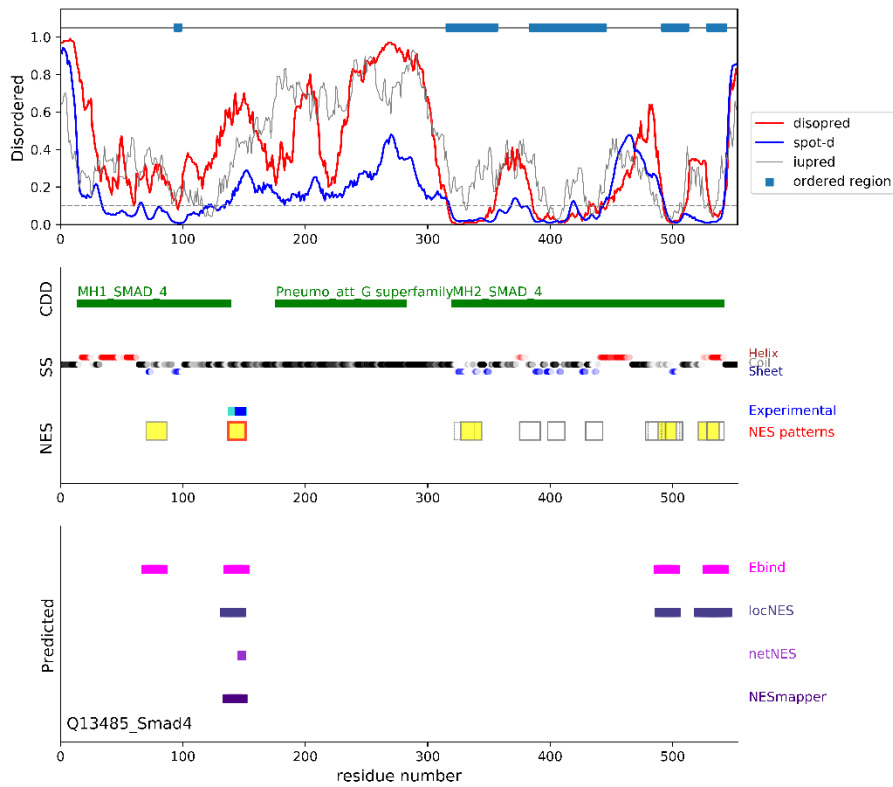

Figure S19. Predicted NES motifs of Smad4 (uniprot ID: Q13485) using Ebind, locNES, netNES, and NESmapper.



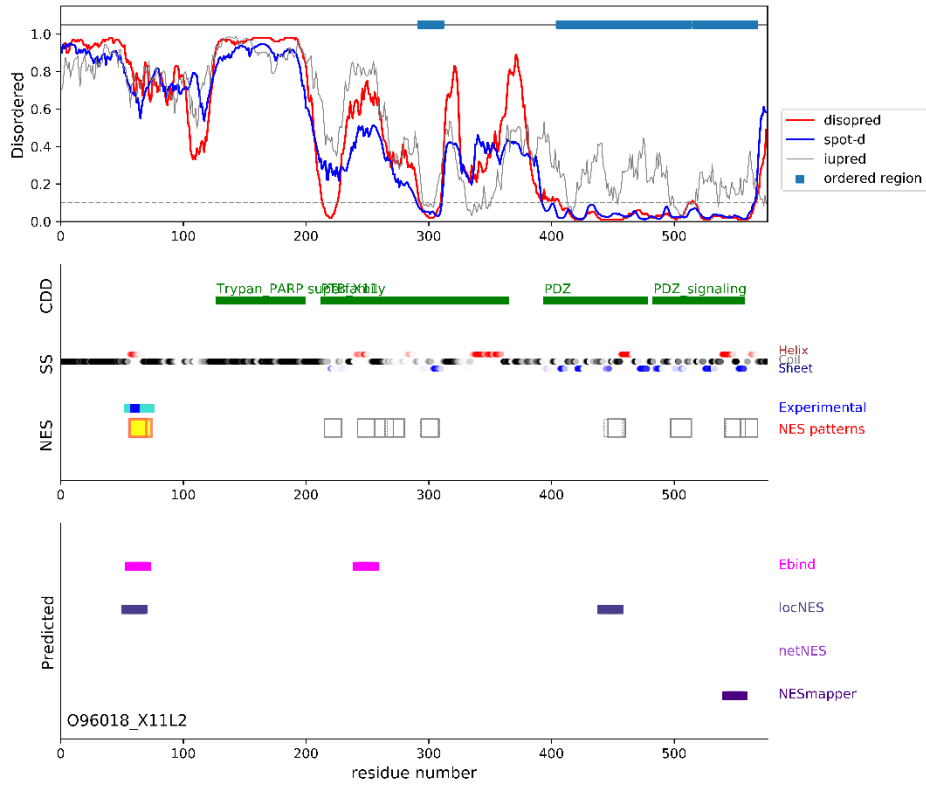

Figure S20. Predicted NES motifs of X11L2 (uniprot ID: O96018) using E<sub>bind</sub>, locNES, netNES, and NESmapper.
